# Supplementary material
Source: MDPI journal article supplement (https://www.mdpi.com/1999-4907/6/8/2505)
Supplement: s1 [file s1]

Supplementary Information


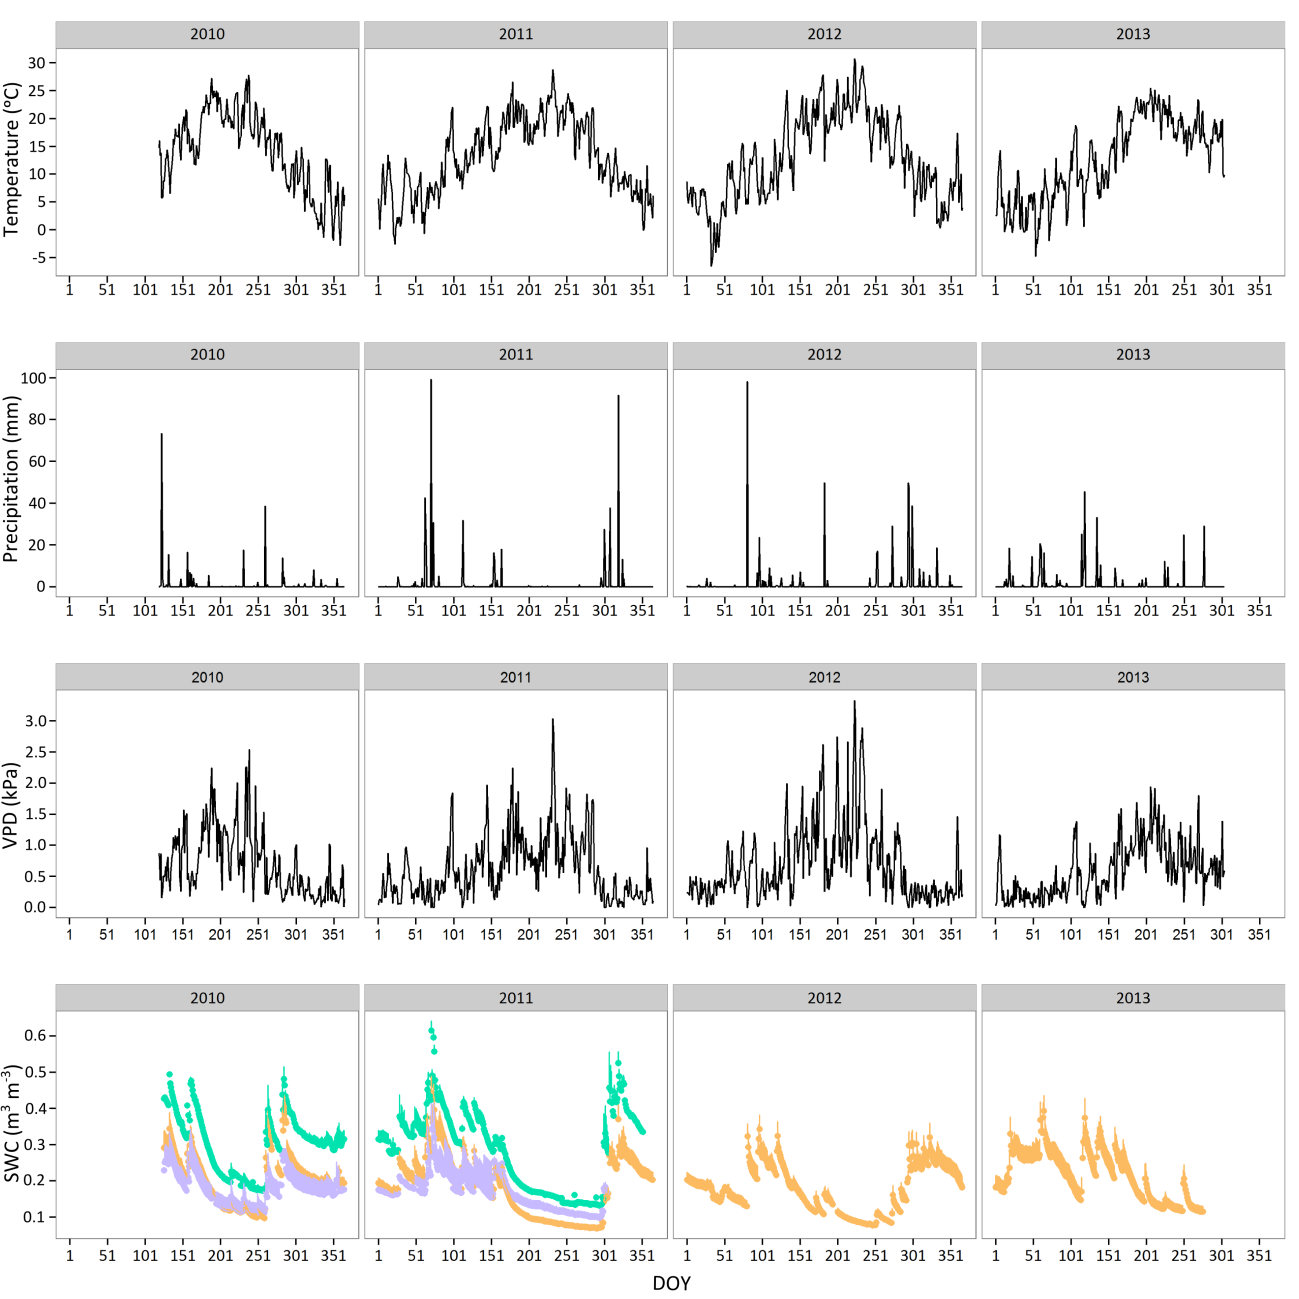


**Figure S1.** Seasonal course of temperature, precipitation, vapor pressure deficit (VPD), and soil water content (SWC; Orange symbols, mixed stand from Tillar valley; green symbols, pure *Pinus sylvestris* stand from Tillar valley; purple symbols, pure *Quercus ilex* stand from Tillar valley) over the study period; DOY, day of year. Error bars indicate +1 SE (only positive SEs are depicted to improve trend clarity). Note that SWC values > ~0.5 m3·m−3 may be anomalous as a result of sensor malfunction (or inadequate calibration) under exceptionally wet conditions.


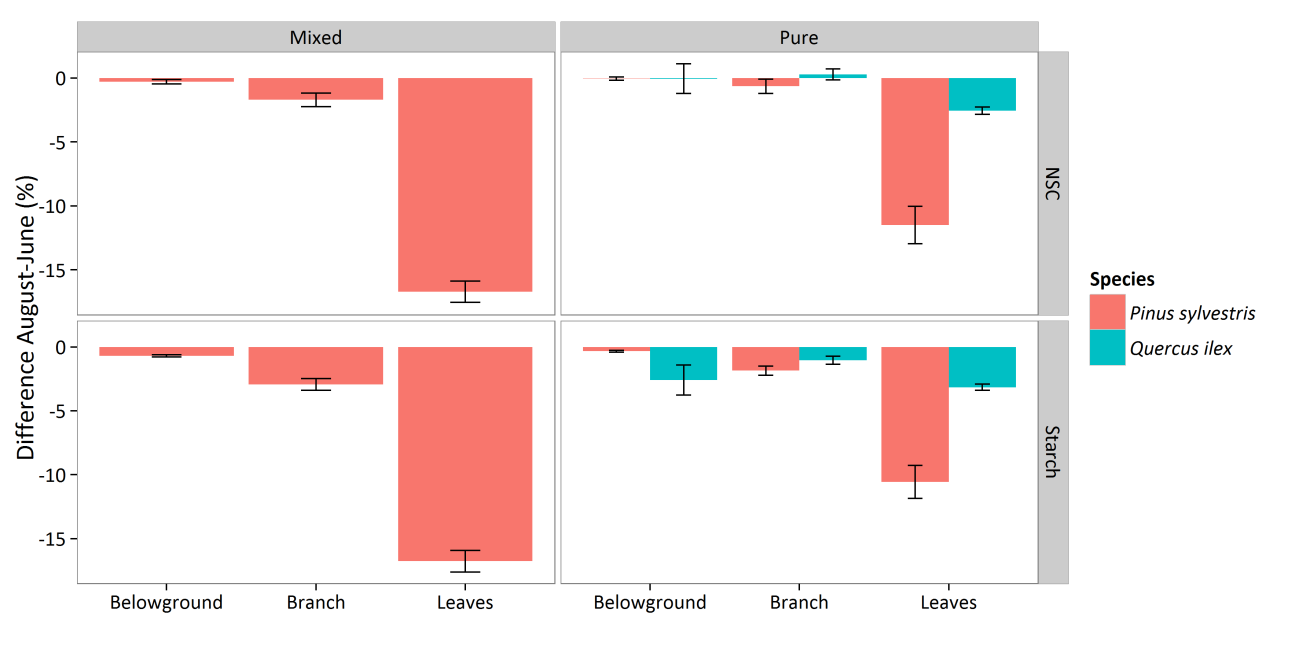


**Figure S2.** Absolute difference between August and June in measured total non-structural carbohydrates (ΔNSCAug-Jun, upper panels) and starch (ΔStarchAug-Jun, bottom panels). Values are given for different organs, stand types (columns), and species. Average values for *P. sylvestris* and *Q. ilex* trees are shown. Error bars indicate ±1 SE.

**Table S1.** Summary of the fitted quantile regressions (95th percentile) with stomatal conductance (*Gs,md*) as response variable. The lower and upper bounds of the confidence intervals are also indicated in brackets.

| **Species** | **Log (SWC)** | | | | **log (VPD)** | | | |
| --- | --- | --- | --- | --- | --- | --- | --- | --- |
| **Mixed** | | **Pure** | | **Mixed** | | **Pure** | |
| **Intercept** | **Slope** | **Intercept** | **Slope** | **Intercept** | **Slope** | **Intercept** | **Slope** |
| *P. sylvestris* | 5.19 (4.94–5.43) | 1.94 (1.83,2) | 6.83 (6.6–7.93) | 3.32 (3.1–3.78) | 1.68 (1.62–1.78) | −1.04 (−1.29–−0.76) | 2.26 (2.16–2.3) | −1.52 (−1.67–−1.46) |
| *Q. Ilex* | 3.3 (2.74–4.03) | 1.09 (0.75–1.41) | 4.24 (3.66–4.47) | 1.77 (1.37–1.89) | 1.05 (1.02–1.08) | −0.75 (−0.81–−0.7) | 0.87 (0.84–0.89) | −0.64 (−0.69–−0.58) |

**Table S2.** Summary of the fitted linear mixed models with predawn water potential (ΨPD), midday water potential (ΨMD) and the difference between them (ΔΨ) as response variables.

| **SWC MODEL** | **ΨPD** | **ΨMD** | **ΔΨ** |
| --- | --- | --- | --- |
| Parameter | *R*2 = 0.76 | *R*2 = 0.78 | *R*2 = 0.35 |
| Intercept | 0.89 ± 0.31 ** | −0.11 ± 0.30 (ns) | −0.79 ± 0.20 *** |
| *Quercus ilex* | 1.91 ± 0.52 ** | 2.04 ± 0.50 *** | 0.70 ± 0.15 *** |
| Pure stand | −0.46 ± 0.51 (ns) | −0.80 ± 0.49 (ns) | −0.81 ± 0.14 *** |
| SWC | 1.06 ± 0.15 *** | 0.82 ± 0.15 *** | 16.50 ± 2.52 *** |
| SWC^2 | ne | ne | −44.45 ± 7.07 *** |
| *Quercus ilex*: Pure stand | 4.31 ± 0.95 *** | 3.59 ± 0.92 ** | 0.24 ± 0.11 * |
| *Quercus ilex*: SWC | 1.31 ± 0.25 *** | 1.53 ± 0.24 *** | −2.79 ± 0.98 ** |
| Pure stand: SWC | −0.04 ± 0.30 (ns) | -0.32 ± 0.29 (ns) | ni |
| *Quercus ilex*: Pure stand: SWC | 2.26 ± 0.51 *** | 1.95 ± 0.49 *** | ni |
| Pure stand: SWC^2 | ne | ne | 16.17 ± 2.82 *** |
| VPD MODEL | ΨPD | ΨMD | ΔΨ |
| Parameter | *R*2 = 0.37 | *R*2 = 0.47 | *R*2 = 0.12 |
| Intercept | −0.78 ± 0.17 *** | −1.37 ± 0.16 *** | 0.51 ± 0.03 *** |
| *Quercus ilex* | −0.14 ± 0.28 (ns) | −0.44 ± 0.26 (ns) | 0.25 ± 0.05 *** |
| VPD | −0.44 ± 0.16 ** | −0.36 ± 0.15 * | ni |
| *Quercus ilex*: VPD | −0.65 ± 0.25 ** | −0.62 ± 0.23 ** | ni |

For factors, the coefficients indicate the difference between each level of a given variable and its reference level. In all models, the reference species was *Pinus sylvestris* and the reference stand type was “Mixed stand.” The values are the estimate ± SE. Only interactions between factors present in at least one best-fitting model of all response variables are depicted in the table. Abbreviations: ns, not significant; * 0.01 < *P* < 0.05; ** 0.001 < *P* < 0.01; *** *P* < 0.001; ne, not evaluated in the best model; ni, not included. Conditional *R*2 values are given for each model. Note that SWC was log-transformed in some models (ΨPD and ΨMD) to better capture the functional relationship.

**Table S3.** Summary of the linear mixed effect models of whole-tree leaf-specific hydraulic conductance (*k*S_L) as response variable.

| **Parameter** | ***k*S_L** |
| --- | --- |
| SWC MODEL | *R*2 = 0.47 |
| Intercept | −3.46 ± 1.90 * |
| *Quercus ilex* | −2.43 ± 1.71 (ns) |
| Pure stand | −1.39 ± 2.10 *** |
| SWC | 1.05 ± 1.25 *** |
| *Quercus ilex*: Pure stand | 8.23 ± 2.82 ** |

**Table S3.** *Cont.*

| VPD MODEL | *R*2 = 0.11 |
| --- | --- |
| Intercept | 8.75 ± 8.09 *** |
| Pure stand | −5.18 ± 1.31 *** |
| VPD | ni |

For factors, the coefficients indicate the difference between each level of a given variable and its reference level. In all models, the reference species was *Pinus sylvestris* and the reference stand type was “Mixed stand.” The values are the estimate ± SE. Only interactions between factors present in at least one best-fitting model of all response variables are depicted in the table. Abbreviations: ns, not significant; * 0.05 < *P* < 0.1; ** 0.001 < *P* < 0.01; *** *P* < 0.001; ni, not included. Conditional *R*2 values are given for each model.

**Table S4.** Summary of the fitted linear mixed models with percent loss of hydraulic conductivity (PLC) measured on branches on belowground organs as response variables.

| **Parameter** | **PLC (Branches)** | **PLC (Belowground)** |
| --- | --- | --- |
| SWC MODEL | *R*2 = 0.78 | *R*2 = 0.87 |
| Intercept | 0.68 ± 0.17*** | 0.96 ± 0.15 *** |
| *Quercus ilex* | 1.13 ± 0.07*** | 1.41 ± 0.26 *** |
| Pure stand | 0.27 ± 0.07** | 0.42 ± 0.25 (ns) |
| SWC | −1.11 ± 0.08*** | −1.15 ± 0.08 *** |
| *Quercus ilex*: Pure stand | ni | −2.10 ± 0.48 *** |
| *Quercus ilex*: SWC | ni | 0.26 ± 0.13 * |
| Pure stand: SWC | ni | −0.02 ± 0.15 (ns) |
| *Quercus ilex*: Pure stand: SWC | ni | −0.86 ± 0.25 *** |
| VPD MODEL | *R*2 = 0.68 | *R*2 = 0.58 |
| Intercept | 3.02 ± 0.06 *** | 3.31 ± 0.05 *** |
| *Quercus ilex* | 1.25 ± 0.08 *** | 0.87 ± 0.07 *** |
| Pure stand | −0.18 ± 0.08 * | ni |
| VPD | 0.65 ± 0.09 *** | 0.34 ± 0.05 *** |
| *Quercus ilex*: VPD | −0.19 ± 0.12 (ns) | ni |
| Pure stand: VPD | −0.36 ± 0.12** | ni |

For factors, the coefficients indicate the difference between each level of a given variable and its reference level. In all models, the reference species was *Pinus sylvestris* and the reference stand type was “Mixed stand.” The values are the estimate ± SE. Only interactions between factors present in at least one best-fitting model of all response variables are depicted in the table. Abbreviations: ns, not significant; * 0.01 < *P* < 0.05; ** 0.001 < *P* < 0.01; *** *P* < 0.001; ni, not included in the best model. Conditional *R*2 values are given for each model. Note that SWC and VPD were log-transformed to better capture the functional relationship.

**Table S5.** Summary of the absolute difference of NSC (ΔNSCAug-Jun) and Starch (ΔStarchAug-Jun) and the relative difference of NSC (ΔNSCAug-Jun,rel) and starch (ΔStarchAug-Jun,rel) as response variables.

| **Parameter** | **ΔNSCAug-Jun** | **ΔNSCAug-Jun,rel** | **ΔStarchAug-Jun** | **ΔStarchAug-Jun,rel** |
| --- | --- | --- | --- | --- |
| ***R*2 = 0.78** | ***R*2 = 0.17** | ***R*2 = 0.77** | ***R*2 = 0.11** |
| Intercept | 0.51 ± 0.95 (ns) | −0.23 ± 0.17 (ns) | −0.76 ± 0.84 (ns) | −0.66 ± 0.17 *** |
| *Quercus ilex* | −0.01 ± 1.17 (ns) | 0.43 ± 0.17 * | −2.25 ± 1.04 * | 0.45 ± 0.17 * |
| Branches | −2.21 ± 1.34 (ns) | 0.30 ± 0.21 (ns) | −2.18 ± 1.19 * | −0.06 ± 0.21(ns) |
| Leaves | −18.01 ± 1.34 *** | −0.52 ± 0.21 * | −15.96 ± 1.19 *** | −0.51 ± 0.21 * |
| Pure stand | −0.55 ± 1.34 (ns) | ni | 0.42 ± 1.19 (ns) | ni |
| *Quercus ilex*: Branches | 0.93 ± 1.66 (ns) | ni | 3.06 ± 1.47 * | ni |
| *Quercus ilex*: Leaves | 8.96 ± 1.66 *** | ni | 9.66 ± 1.47 *** | ni |
| Branches: Pure stand | 1.61 ± 1.90 (ns) | ni | 0.67 ± 1.68 (ns) | ni |
| Leaves: Pure stand | 6.56 ± 1.90 *** | ni | 5.73 ± 1.68 ** | ni |

For factors, the coefficients indicate the difference between each level of a given variable and its reference level. In all models, the reference species was *Pinus sylvestris* and the reference stand type was “Mixed stand.” The values are the estimate ± SE. Only interactions between factors present in at least one best-fitting model of all response variables are depicted in the table. Abbreviations: ns, not significant; * 0.05 < *P* < 0.1; ** 0.001 < *P* < 0.01; *** *P* < 0.001; ni, not included in the best model. Conditional *R*2 values are given for each model.
